# Supplementary material
Source: PubMed Central journal article supplement (PMC4545300)
Supplement: NIHMS708740-supplement-2.pdf [file NIHMS708740-supplement-2.pdf]

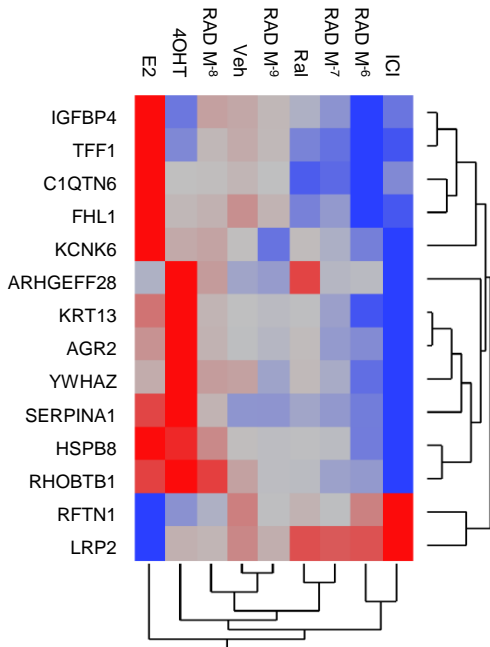

Supplemental Figure 2. MCF7 cells were treated for 24 hours with  $10^{-7}$  M vehicle (Veh), ICI, 4OHT, raloxifene (Ralox), E2 ( $10^{-9}$  M) or RAD1901 ( $10^{-9}$ - $10^{-6}$  M). The expression of ESR1 target genes responsive to (A) agonists, (B) primarily SERMs, or (C) SERMs and agonists was analyzed using RT qPCR following RNA isolation. mRNA expression was normalized ( $\Delta\Delta C_T$  analysis) to the similarly detected 36B4 housekeeping. The profiles presented in dendrogram format were analyzed with the Ward hierarchical clustering algorithm (JMP 11) using standardized data.
